# Supplementary material for: Clinical analysis of functional optical zone after transepithelial photorefractive keratectomy in patients with different degrees of myopic astigmatism
Source: Research Square preprint supplement (doi:10.21203/rs.3.rs-6763091/v1), 2025-07-11
Supplement: Supplementary file 1 [file 18d46a0097aad84c6aa5d797.docx]

**Table2** Postoperative visual and refractive outcomes at 6 months

| | Characteristic | Control | MA | HA | F | P |  | | --- | --- | --- | --- | --- | --- | --- | | UDVA (logMAR) | -0.15 ± 0.25 | -0.20 ± 0.36 | -0.17 ± 0.30 | 2.331 | 0.327 |  | | CDVA (logMAR) | -0.05 ± 0.33 | -0.06 ± 0.41 | -0.05 ± 0.51 | 3.855 | 0.189 |  | | MR sphere (D) | 0.15 ± 0.52 | 0.18 ± 0.65 | 0.17 ± 0.72 | 0.231 | 0.828 |  | | MR cylinder (D) | 0.02± 0.42 | 0.16 ± 0.50 | -0.12 ± 0.64 | 2.163 | 0.152 |  | | MRSE (D) | 0.16 ± 0.45 | 0.26± 0.56 | 0.23 ± 0.68 | 1.956 | 0.356 |  | | Sphericalaberration (µm) | 0.180± 0.12 | 0.163 ± 0.18 | 0.134 ± 0.16 | 0.831 | 0.521 |  | | coma (µm) | 0.277± 0.23 | 0.191 ± 0.23 | 0.154 ± 0.22 | 4.430 | 0.013 |  | | Total HOAs (µm) | 0.552± 0.21 | 0.541 ± 0.35 | 0.538 ± 0.45 | 0.060 | 0.953 |  | |
| --- | --- | --- | --- | --- | --- | --- | --- | --- | --- | --- | --- | --- | --- | --- | --- | --- | --- | --- | --- | --- | --- | --- | --- | --- | --- | --- | --- | --- | --- | --- | --- | --- | --- | --- | --- | --- | --- | --- | --- | --- | --- | --- | --- | --- | --- | --- | --- | --- | --- | --- | --- | --- | --- | --- | --- | --- | --- | --- | --- | --- | --- | --- | --- |

Values are presented as number, mean ± standard deviation.UDVA = uncorrected distance visual acuity; logMAR = logarithm of the minimum angle of resolution; CDVA = corrected distance visual acuity; MR = manifest refraction; D = diopter; MRSE = manifest refraction spherical equivalent; D = diopters; HA = high astigmatism; MA = moderate astigmatism.
