# Supplementary material for: Clinical analysis of functional optical zone after transepithelial photorefractive keratectomy in patients with different degrees of myopic astigmatism
Source: Research Square preprint supplement (doi:10.21203/rs.3.rs-6763091/v1), 2025-07-11
Supplement: Supplementary file 2 [file 7c2f7e896cc5e9ef2bbd6634.docx]

**Table 4** Factors That affect the Postoperative Functional Optical Zone

Using Multiple Linear Regression Analysis

| Groups | Characteristic | β | Standard Error | 95% CI | p | VIF |
| --- | --- | --- | --- | --- | --- | --- |
| Control | Steep keratometry (D) | 0.05 | 0.014 | −0.25(−0.390~0.13) | < 0.001 | 1.054 |
| MA | Correction MRSE (D) | 0.08 | 0.012 | −0.24(−0.26~0.02) | < 0.001 | 1.041 |
| HA | Correction cylinde（D） | -163 | 0.023 | -0.74(−1.12~−0.33) | < 0.001 | 1.109 |

VIF = variance inflation factor

HA = high astigmatism; MA = moderate astigmatism.
