# Supplementary material for: Clinical analysis of functional optical zone after transepithelial photorefractive keratectomy in patients with different degrees of myopic astigmatism
Source: Research Square preprint supplement (doi:10.21203/rs.3.rs-6763091/v1), 2025-07-11
Supplement: Supplementary file 3 [file 8639b201f30a60d8431bbc73.docx]

**TAble1** Patient demographics features

| Characteristic | Control | MA | HA | Ｆ/ χ ２ | P |
| --- | --- | --- | --- | --- | --- |
| Number of eyes | 40 | 42 | 48 | 3.412 | 0.218 |
| Sex (male/female) | 21:19 | 23:19 | 26:22 | 3.544 | 0.185 |
| Age (y), mean | 24.12±4.02 | 24.23±4.13 | 24.03±3.34 | 3.761 | 0.223 |
| UDVA (logMAR) | 0.88 ± 0.30 | 0.88 ± 0.33 | 0.87 ± 0.31 | 2.801 | 0.267 |
| CDVA (logMAR) | − 0.05 ± 0.06 | −0.05 ± 0.05 | +0.05±0.04 | 0.174 | 0.231 |
| MR sphere (D) | −4.15 ± 1.91 | −4.26 ± 2.03 | −4.17±1.86 | 0.50 | 0.629 |
| MR cylinder (D) | 0 | -1.06 ± 0.47 | -2.32±0.22 | 312.35 | 0.001 |
| MRSE (D) | -4.16 ± 1.91 | -4.72 ± 2.15 | -5.33±1.85 | 5.30 | 0.006 |
| CCT (µm) | 540.12± 29.02 | 539.79± 29.51 | 540.79±31.22 | 0.05 | 0.982 |
| Steep keratometry (D) | 42.42 ± 1.53 | 42.26 ± 1.45 | 42.07 ± 1.13 | 3.006 | 0.062 |
| Flat keratometry (D) | 43.12 ± 1.72 | 43.56 ± 1.68 | 44.29 ± 1.17 | 1.845 | 0.214 |
| Average keratometry (D) | 42.77± 1.62 | 42.91± 1.61 | 43.18± 1.15 | 0.063 | 0.940 |

Values are presented as number, mean ± standard deviation.UDVA = uncorrected distance visual acuity; logMAR = logarithm of the minimum angle of resolution; CDVA = corrected distance visual acuity; MR = manifest refraction; D = diopter; MRSE = manifest refraction spherical equivalent; CCT = central corneal thickness; D = diopters; HA = high astigmatism; MA = moderate astigmatism.
