# Supplementary material for: Clinical analysis of functional optical zone after transepithelial photorefractive keratectomy in patients with different degrees of myopic astigmatism
Source: Research Square preprint supplement (doi:10.21203/rs.3.rs-6763091/v1), 2025-07-11
Supplement: Supplementary file 4 [file d49445f0a9c76afb8e8cad87.docx]

**Table3** Comparison of Corneal Curvature Changes

| Characteristic | Control | MA | HA | F/K | P |
| --- | --- | --- | --- | --- | --- |
| △Flat keratometry (D) | 4.50± 0.92 | 4.65 ± 1.12 | 4.73 ± 1.32 | 0.640 | 0.556 |
| △Steep keratometry (D) | 4.42 ± 0.98 | 5.28 ± 1.15 | 6.04 ± 1.14 | 17.200 | < .001 |
| △Average keratometry (D) | 4.48 ± 0.93 | 4.96 ± 1.13 | 5.38 ± 1.18 | 5.680 | 0.005 |
| △Corneal astigmatism（D） | 0.08 ± 0.25 | 0.63 ± 0.43 | 1.41 ± 0.56 | 73.212 | < .001 |
| △Q value | 1.12 ± 0.21 | 1.27 ± 0.25 | 1.46 ± 0.23 | 5.435 | 0.007 |
| △CCT(mm) | 87.00±12.82 | 105.75±19.52 | 117.21±19.12 | 20.532 | < 0.001 |

ㅿ = difference (postoperative - preoperative)
